# Supplementary material for: Learning to perform role-filler binding with schematic knowledge
Source: PeerJ journal article supplement (doi:10.7717/peerj.11046), 2021-03-31
Supplement: figure_S1.pdf [file figure_S1.pdf]

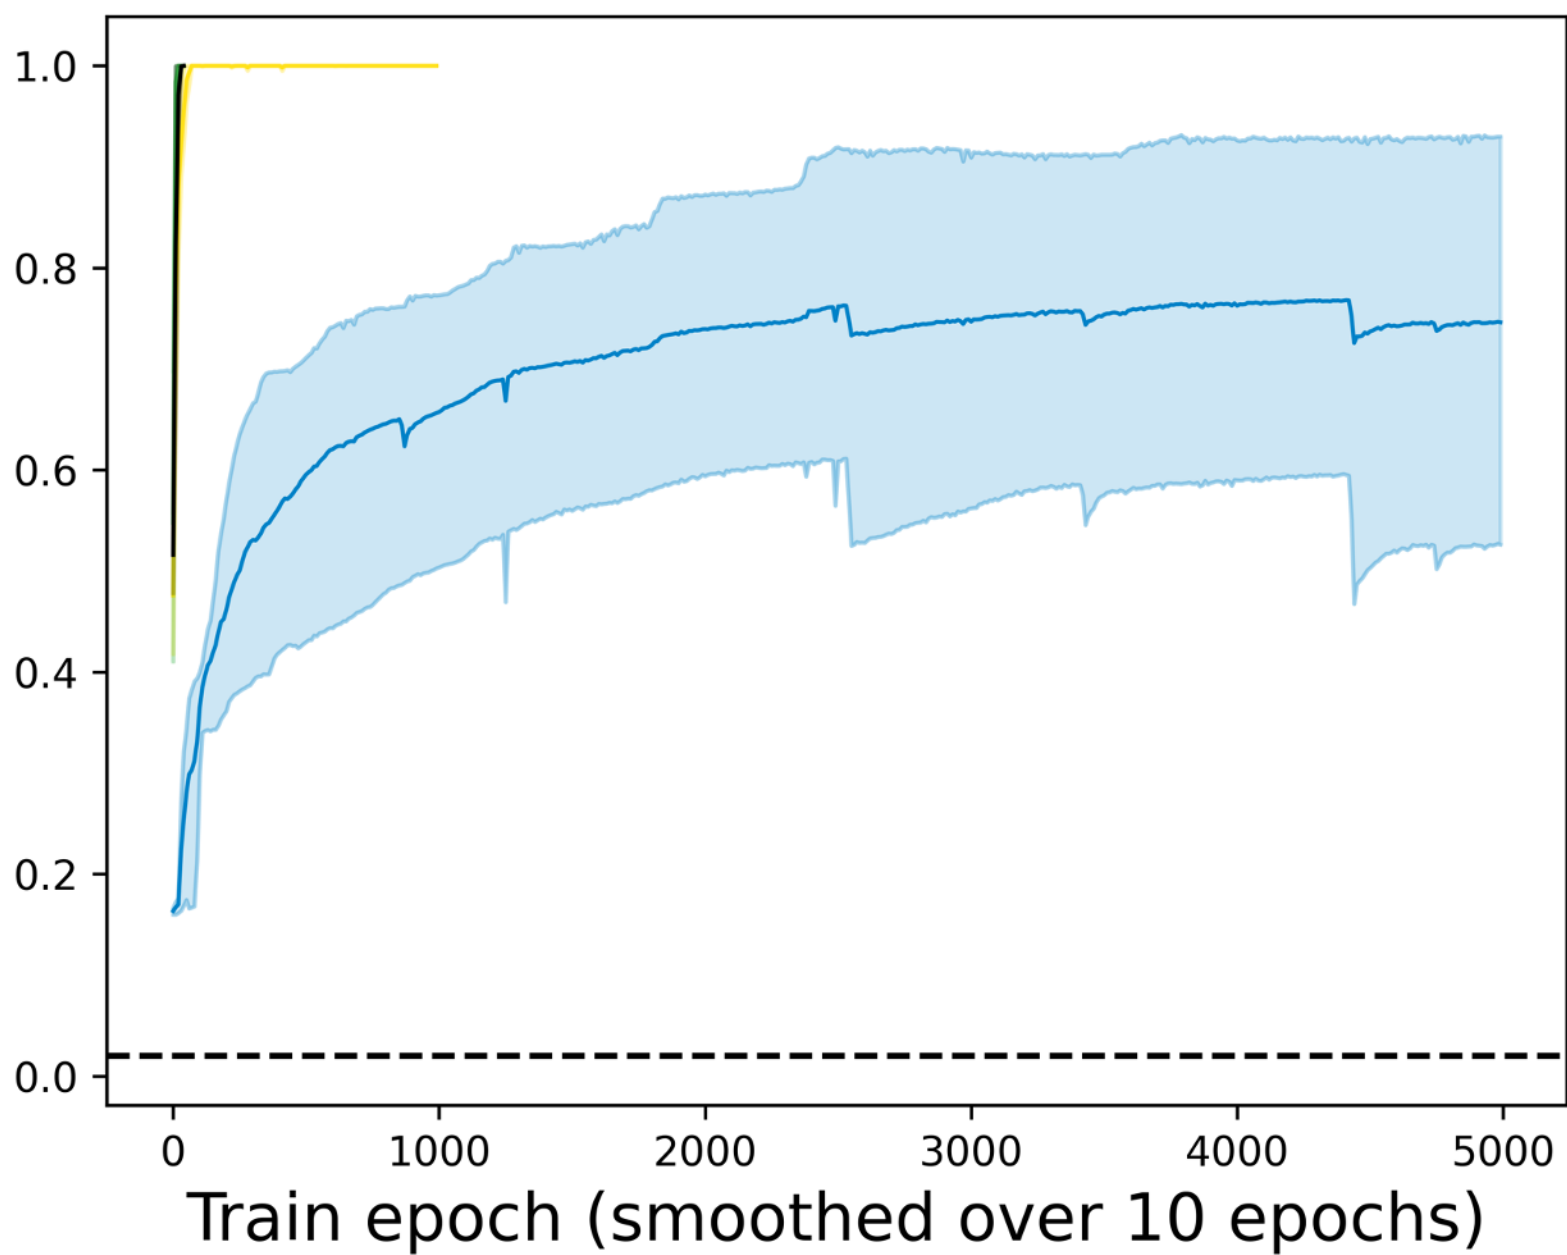

A

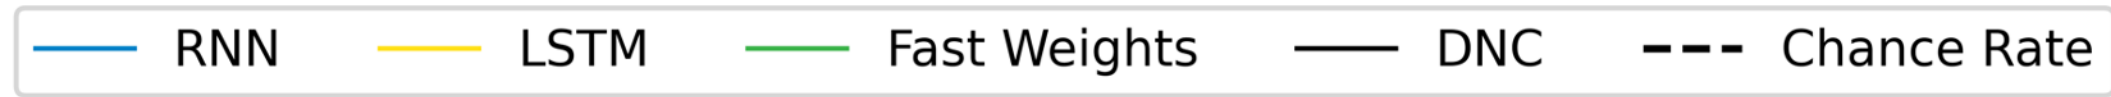

B
