# Supplementary material for: Learning to perform role-filler binding with schematic knowledge
Source: PeerJ journal article supplement (doi:10.7717/peerj.11046), 2021-03-31
Supplement: figure_S2.pdf [file figure_S2.pdf]

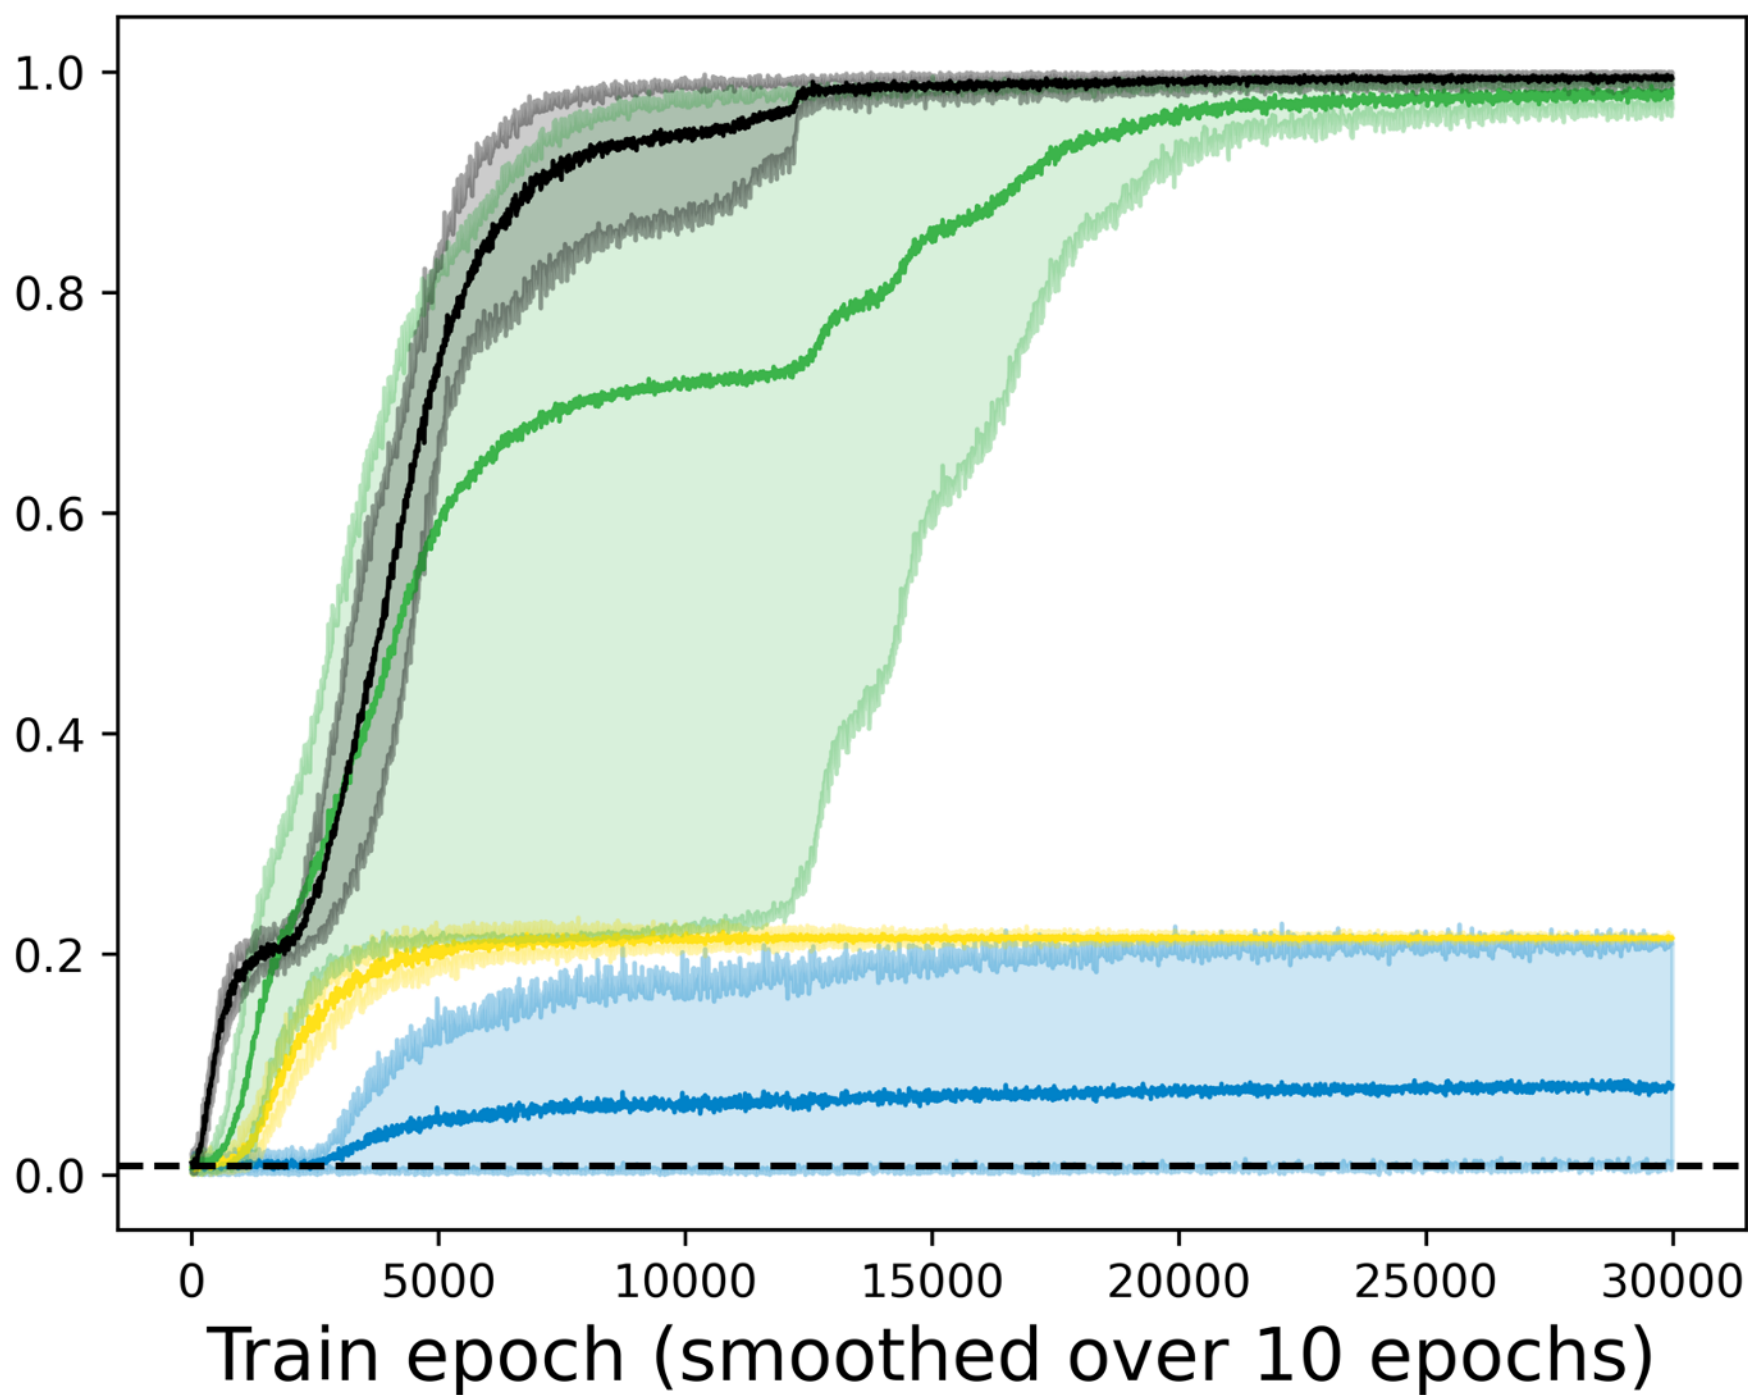

A

— RNN    — LSTM    — Fast Weights    — DNC    - - - Chance Rate

B
