# Supplementary material for: Learning to perform role-filler binding with schematic knowledge
Source: PeerJ journal article supplement (doi:10.7717/peerj.11046), 2021-03-31

Histogram of Write Weights by Filler

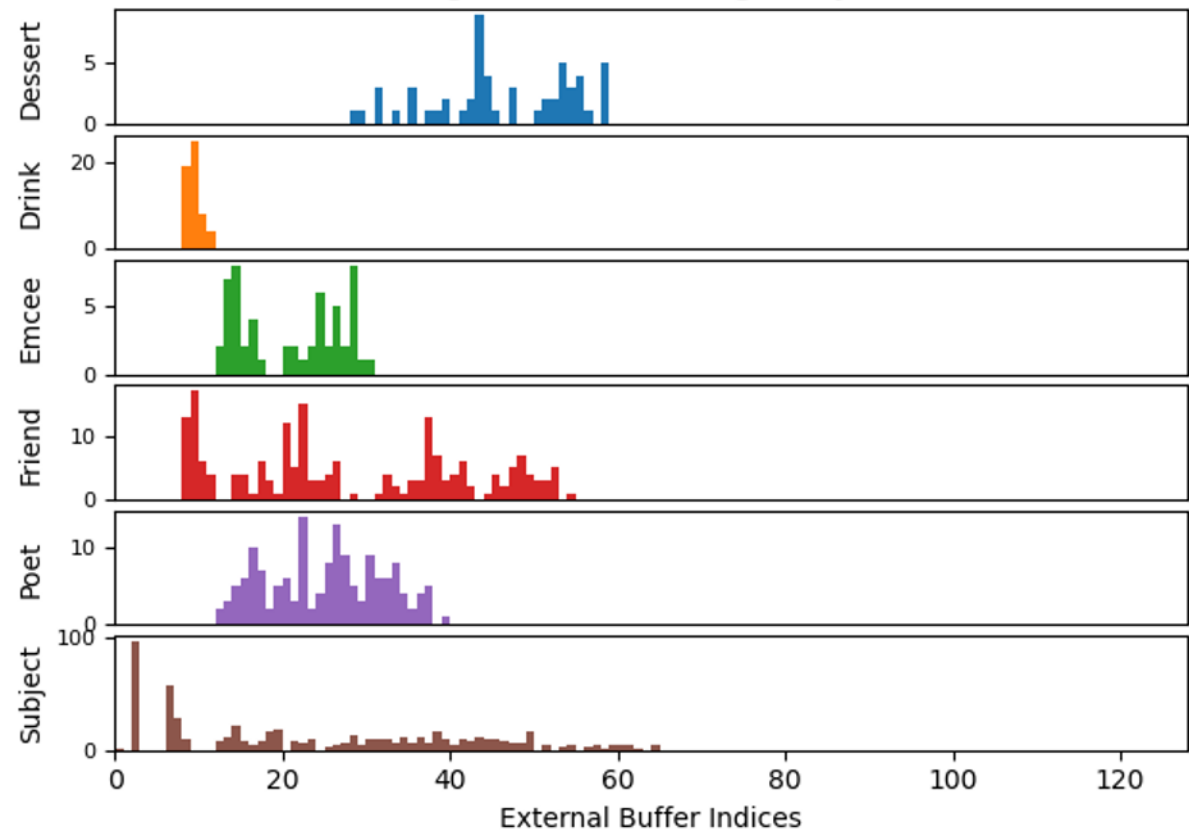

Histogram of Read Weights by Query

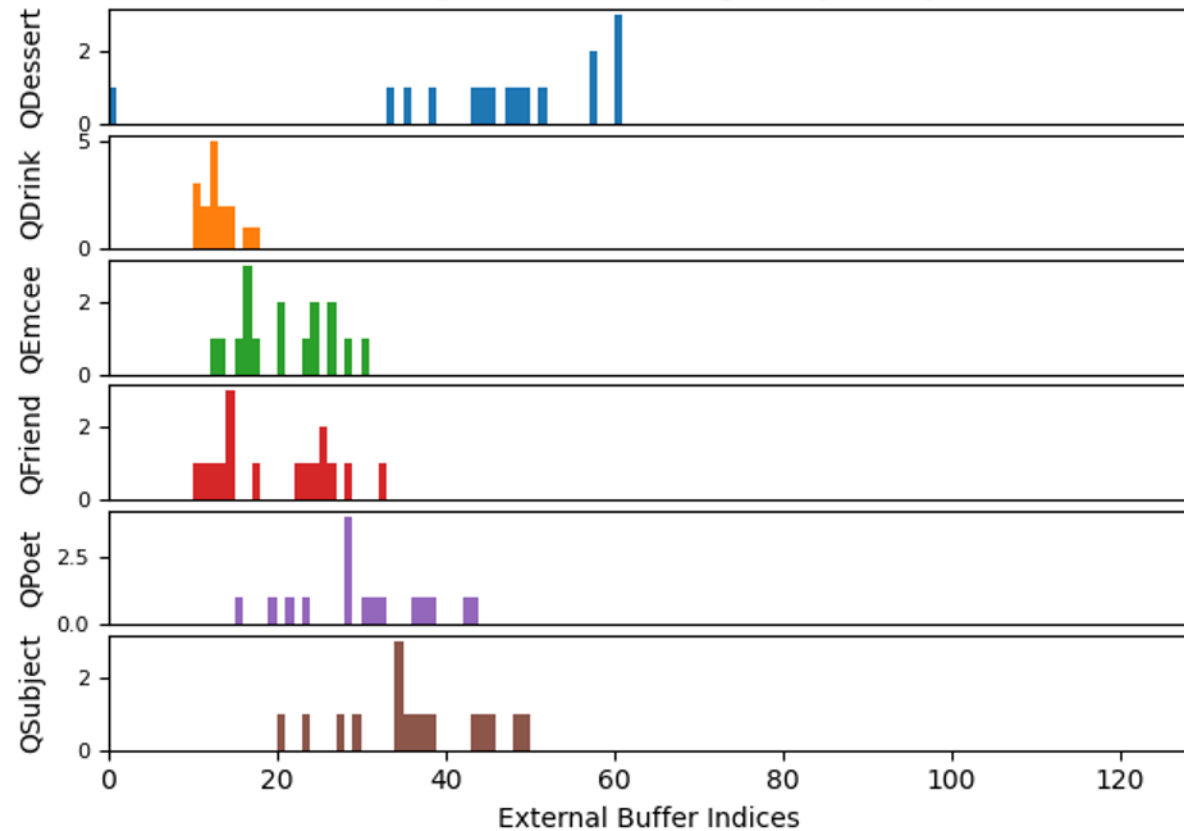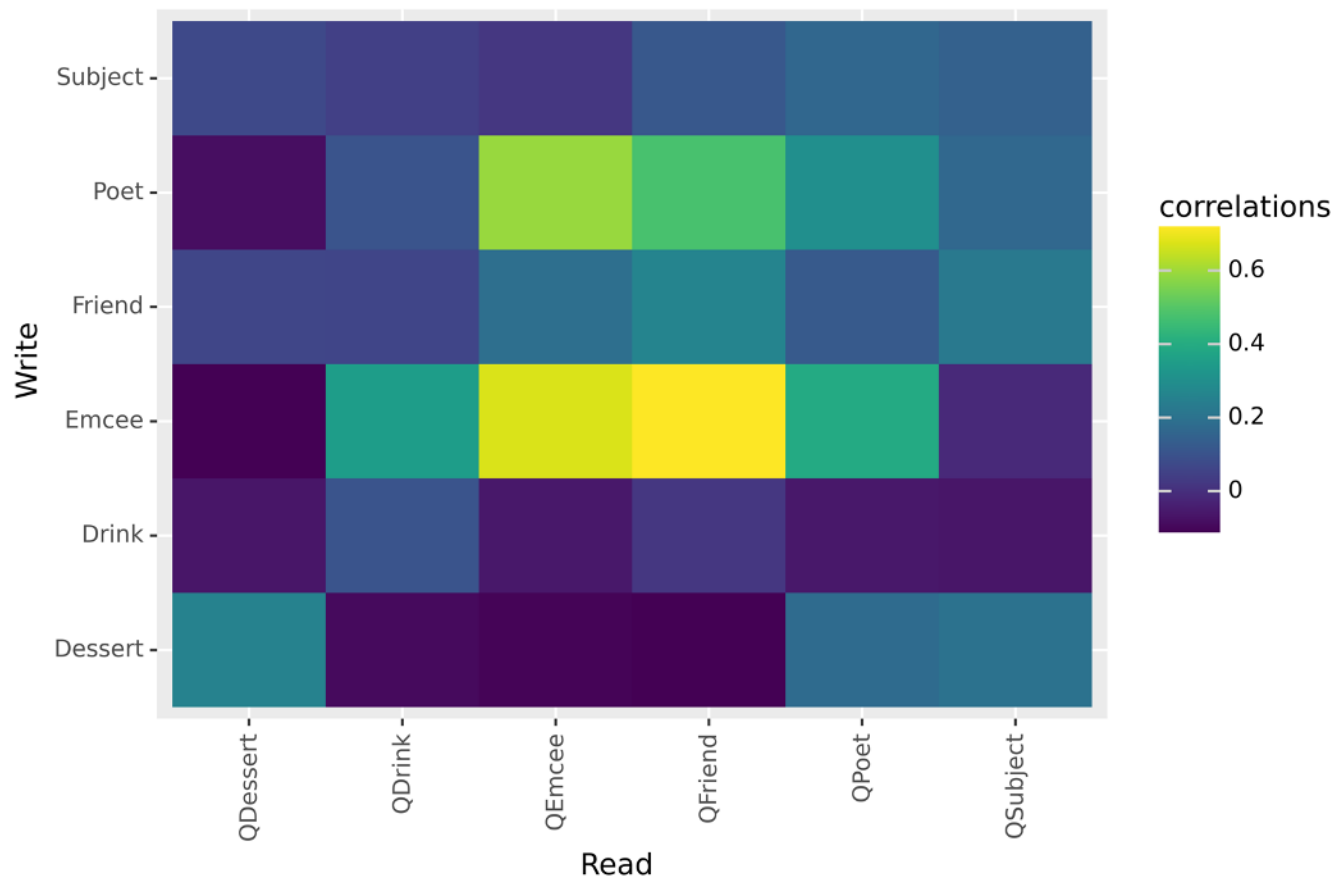

Supplement: figure_S4.pdf [file figure_S4.pdf]
