# Supplementary material for: Learning to perform role-filler binding with schematic knowledge
Source: PeerJ journal article supplement (doi:10.7717/peerj.11046), 2021-03-31
Supplement: figure_S6.pdf [file figure_S6.pdf]

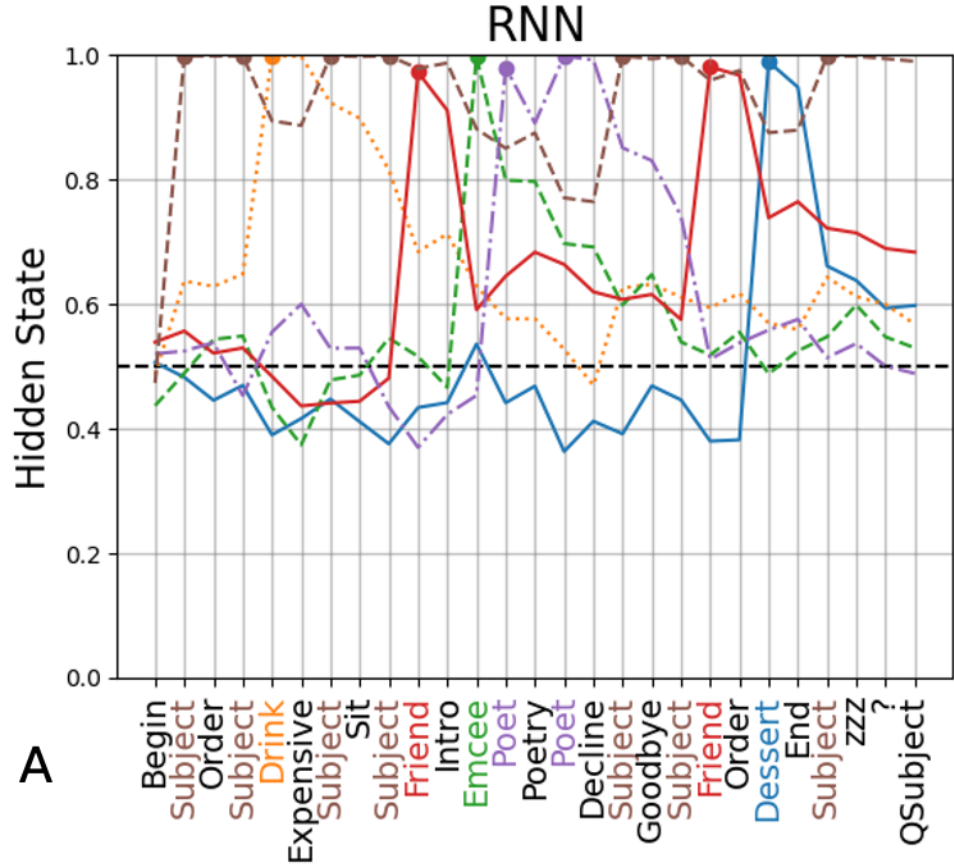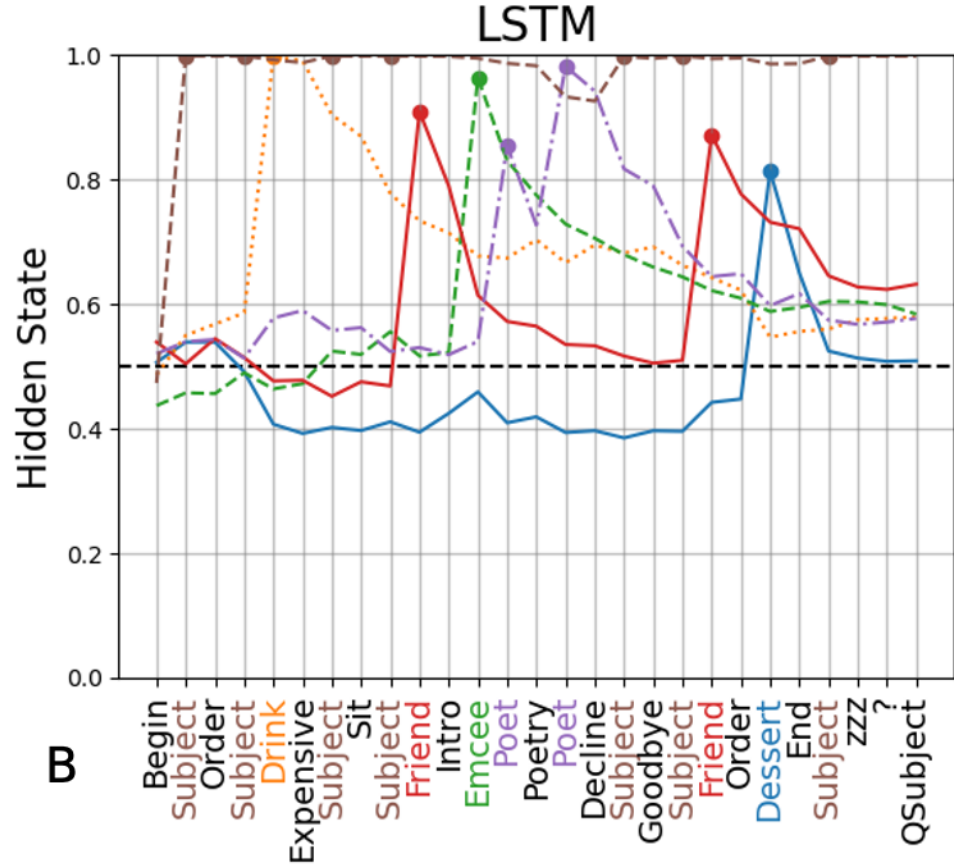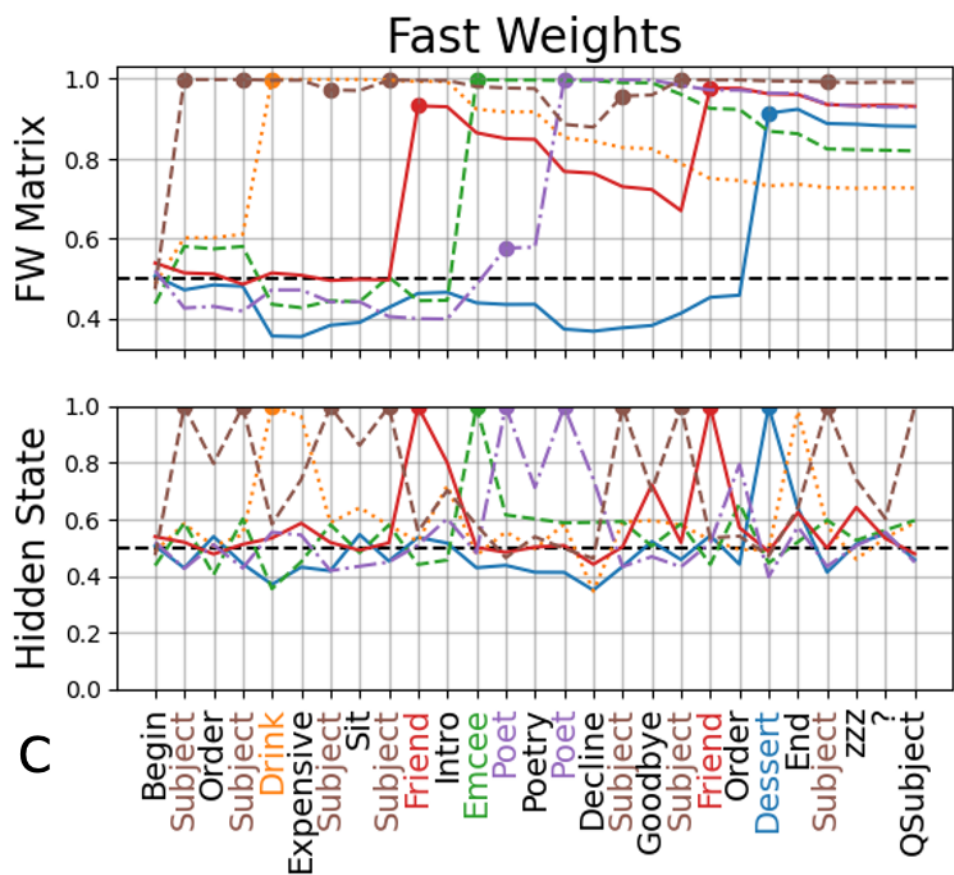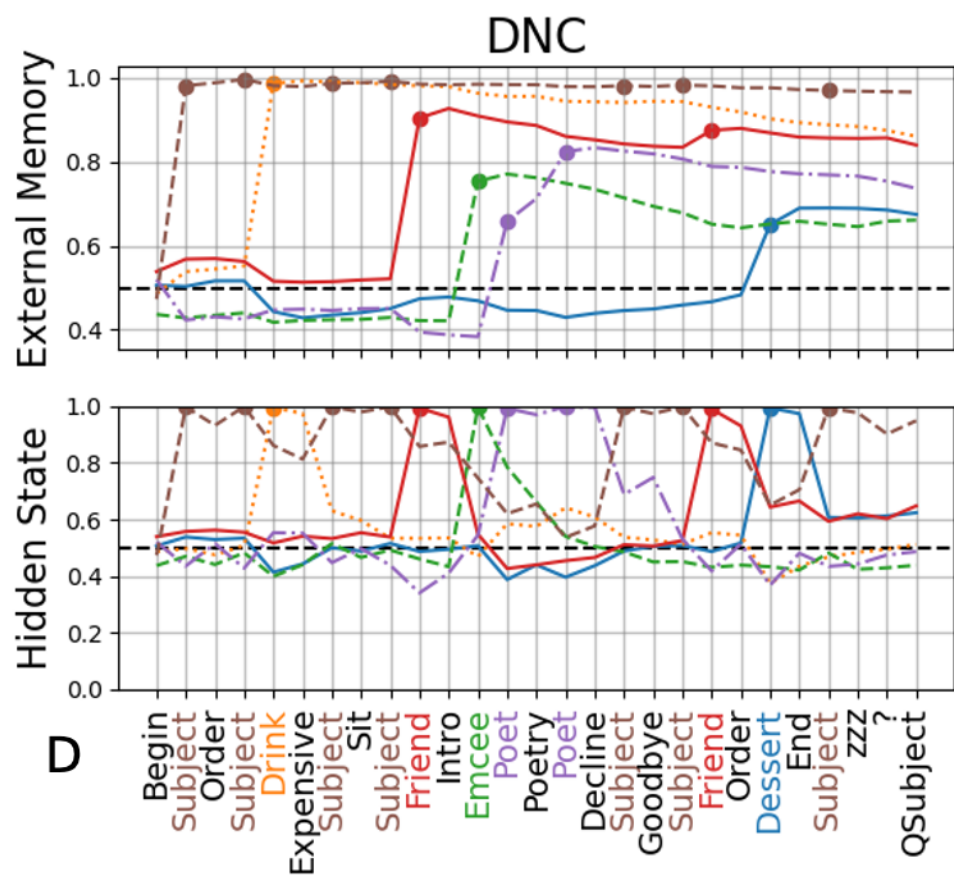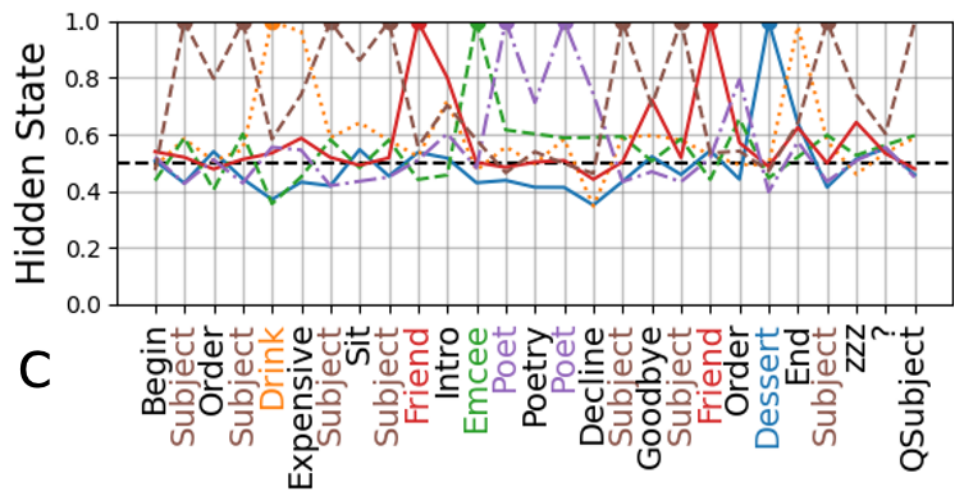

Legend for panels A, B, C, D, E:

- Dessert (Blue solid line)
- Drink (Orange dotted line)
- Emcee (Green dashed line)
- Friend (Red solid line)
- Poet (Purple dashed line)
- Subject (Brown dashed line)
