# Supplementary material for: Learning to perform role-filler binding with schematic knowledge
Source: PeerJ journal article supplement (doi:10.7717/peerj.11046), 2021-03-31

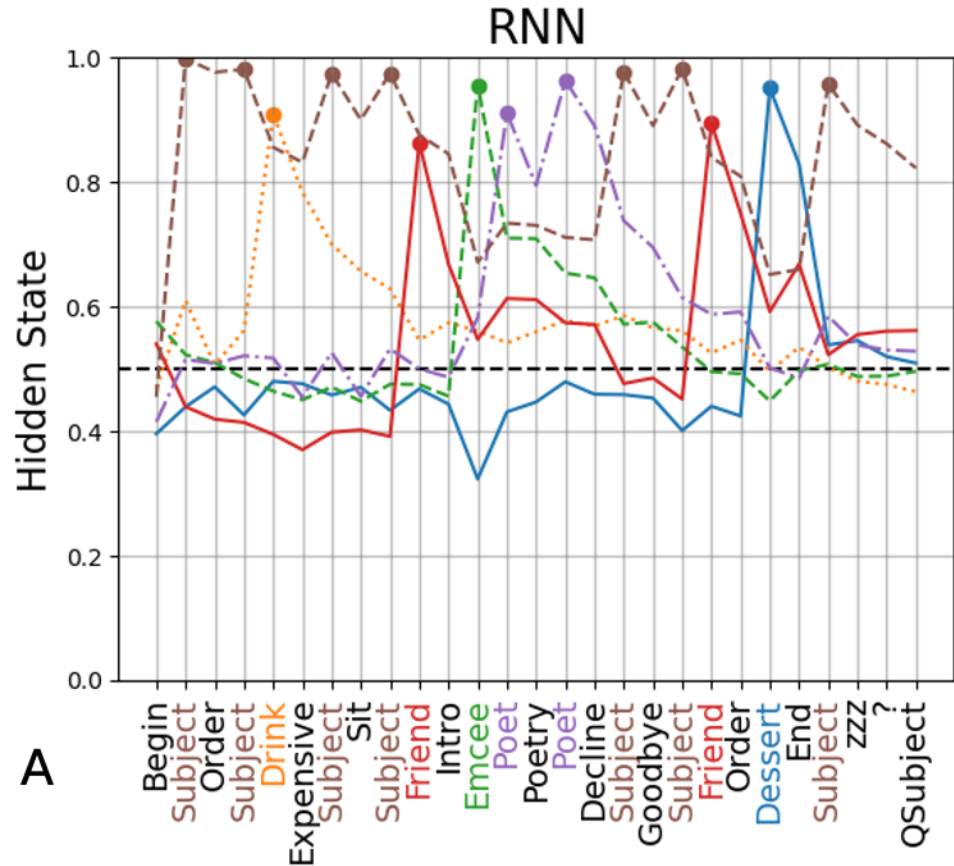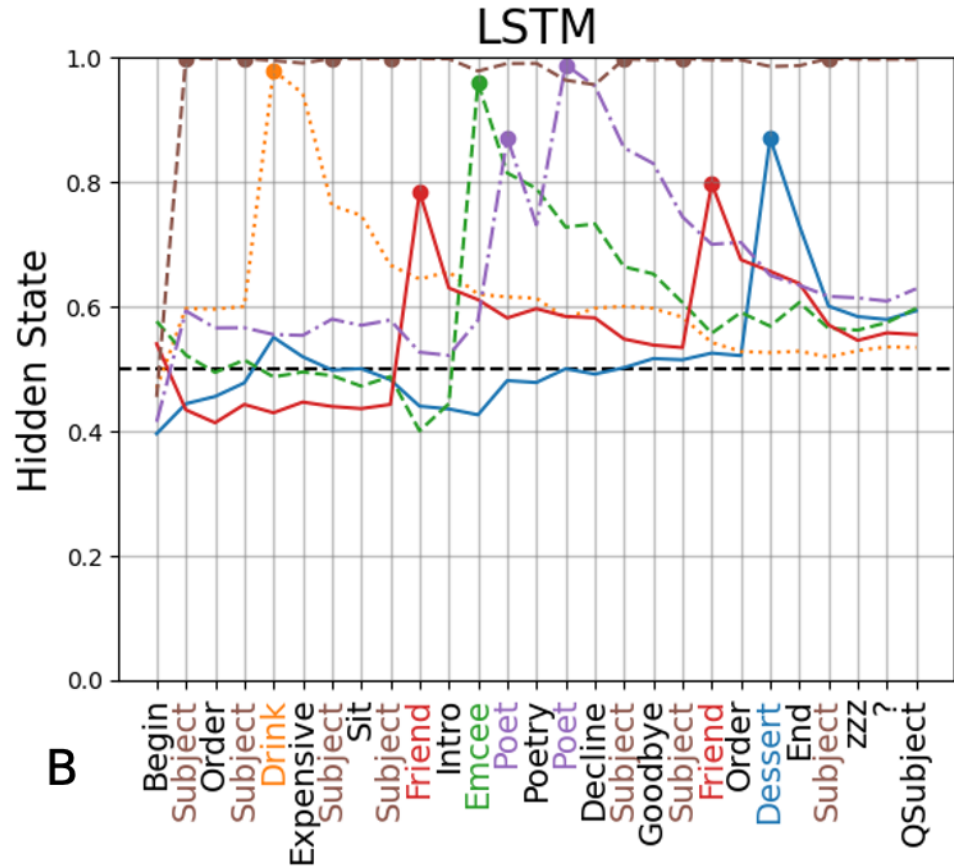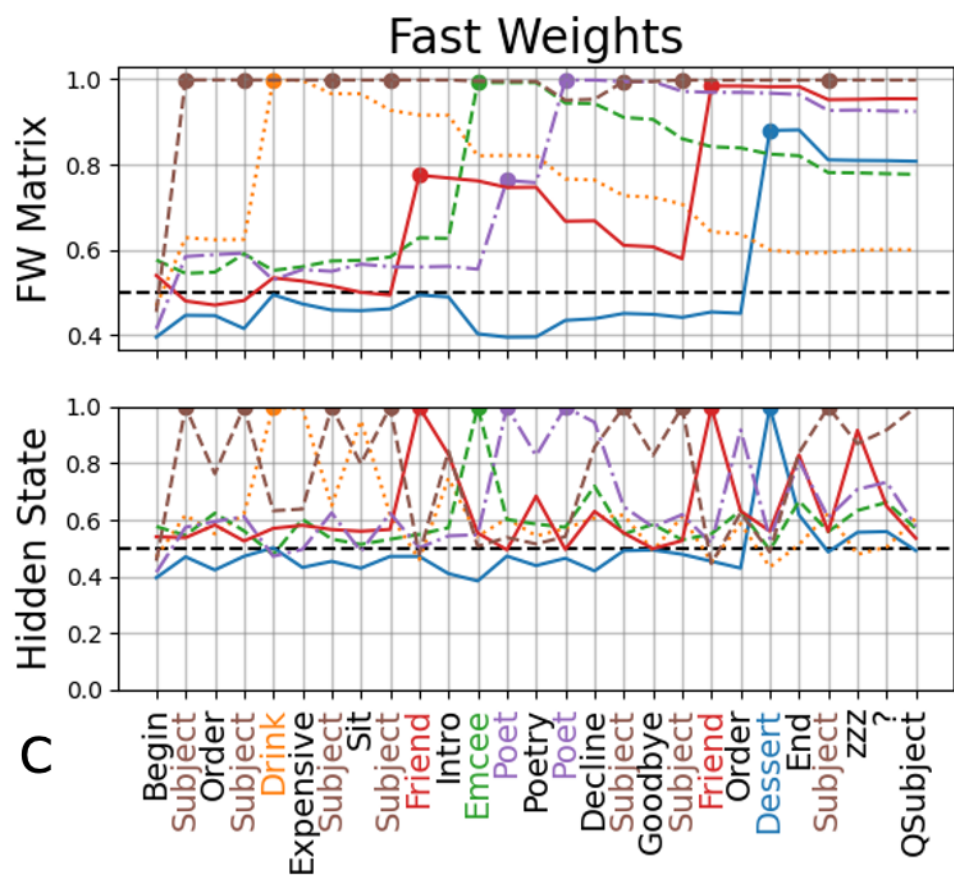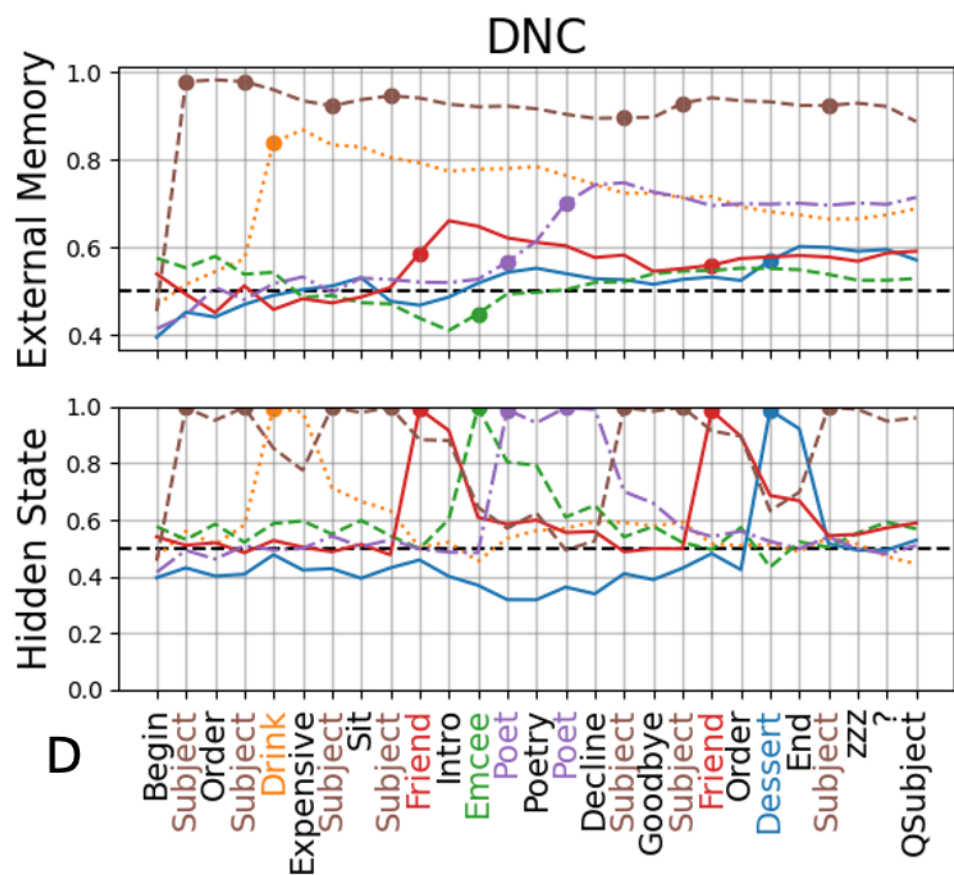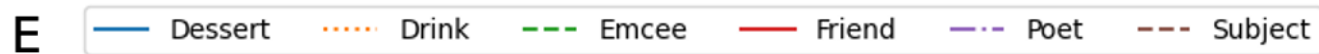

Supplement: figure_S7.pdf [file figure_S7.pdf]
